# Supplementary material for: Leveraging the signature of heterotrophic respiration on atmospheric CO 2 for model benchmarking
Source: Copernicus journal article supplement (doi:10.5194/bg-2019-256), 2019-07-15
Supplement: Supplementary file [file bg-2019-256-AC2-supplement.pdf]

Table S1: Marine Boundary Layer (MBL) stations within the NOAA Earth System Research Laboratory CO<sub>2</sub> sampling network (ESRL). These sites were selected for obtaining at least 50% data coverage over the analysis period of 1982 to 2010.

| Region   | Station                    | Acronym | Lat   | Lon    |
|----------|----------------------------|---------|-------|--------|
| 60°–90°N | Alert, AK                  | ALT     | 82.5  | -62.5  |
|          | Ny-Ålesund, Svalbard       | ZEP     | 78.9  | 11.9   |
|          | Barrow, AK                 | BRW     | 71.3  | -156.6 |
|          | Stórhöfði, Iceland         | ICE     | 63.4  | -20.0  |
| 23°–60°N | Mace Head, Ireland         | MHD     | 53.3  | -9.9   |
|          | Shemya, AK                 | SHM     | 52.7  | 174.1  |
|          | Terceira Island, Azores    | AZR     | 38.8  | -27.4  |
|          | Tudor Hill, Bermuda        | BMW     | 32.3  | -64.9  |
|          | Sand Island, Midway        | MID     | 28.2  | -177.4 |
|          | Key Biscayne, FL           | KEY     | 25.7  | -80.2  |
|          | Pacific Ocean, 25°N        | POCN25  | 25.0  | -135.0 |
| 0°–23°N  | Pacific Ocean, 20°N        | POCN20  | 20.0  | -139.0 |
|          | Cape Kumukahi, HI          | KUM     | 19.5  | -154.8 |
|          | Pacific Ocean, 15°N        | POCN15  | 15.0  | -143.0 |
|          | Mariana Islands, Guam      | GMI     | 13.4  | 144.8  |
|          | Ragged Point, Barbados     | RPB     | 13.2  | -59.4  |
|          | Pacific Ocean, 10°N        | POCN10  | 10.0  | -147.0 |
|          | Pacific Ocean, 5°N         | POCN05  | 5.0   | -151.0 |
|          | Christmas Island           | CHR     | 1.7   | -157.2 |
| 0°–23°S  | Seychelles                 | SEY     | -4.7  | 55.2   |
|          | Pacific Ocean 5°S          | POCS05  | -5.0  | -159.0 |
|          | Ascension Island           | ASC     | -8.0  | -14.4  |
|          | Pacific Ocean 10°S         | POCS10  | -10.0 | -163.0 |
|          | Tutuila American Samoa     | SMO     | -14.2 | -170.6 |
|          | Pacific Ocean 15°S         | POCS15  | -15.0 | -167.0 |
|          | Pacific Ocean 20°S         | POCS20  | -20.0 | -171.0 |
| 23°–60°S | Pacific Ocean 25°S         | POCS25  | -25.0 | -174.0 |
|          | Pacific Ocean 30°S         | POCS30  | -30.0 | -177.0 |
|          | Cape Grim, Australia       | CGO     | -40.7 | 144.7  |
|          | Crozet Island              | CRZ     | -46.5 | 51.9   |
| 60°–90°S | Palmer Station, Antarctica | PSA     | -64.0 | -64.0  |
|          | Syowa Antarctica           | SYO     | -69.0 | 39.6   |
|          | Halley Bay, Antarctica     | HBA     | -75.6 | -26.5  |
|          | South Pole                 | SPO     | -90.0 | -24.8  |

Table S2: Coefficient of variation for flux variables by latitude zone. All variables have been detrended using a third-order polynomial fit. For NEP, a negative sign represents flux into land and a positive sign represents a flux to the atmosphere from land.

| Region   | Model Flux | Mean Flux<br>[Pg C yr <sup>-1</sup> ] | Flux Standard<br>Deviation<br>(STD)<br>[Pg C yr <sup>-1</sup> ] | STD : Flux<br>[%] |
|----------|------------|---------------------------------------|-----------------------------------------------------------------|-------------------|
| 61°-90°N | CASA HR    | 3.94                                  | 0.08                                                            | 2                 |
|          | CORPSE HR  | 4.52                                  | 0.23                                                            | 5                 |
|          | MIMICS HR  | 3.96                                  | 0.09                                                            | 2                 |
|          | CASA NPP   | 4.07                                  | 0.09                                                            | 2                 |
|          | CASA NEP   | -0.13                                 | 0.05                                                            | 40                |
|          | CORPSE NEP | 0.45                                  | 0.16                                                            | 35                |
|          | MIMICS NEP | -0.11                                 | 0.08                                                            | 76                |
| 24°-60°N | CASA HR    | 22.73                                 | 0.24                                                            | 1                 |
|          | CORPSE HR  | 23.06                                 | 0.31                                                            | 1                 |
|          | MIMICS HR  | 22.88                                 | 0.48                                                            | 2                 |
|          | CASA NPP   | 23.15                                 | 0.28                                                            | 1                 |
|          | CASA NEP   | -0.42                                 | 0.40                                                            | 96                |
|          | CORPSE NEP | -0.09                                 | 0.46                                                            | 505               |
|          | MIMICS NEP | -0.27                                 | 0.66                                                            | 245               |
| 1°-23°N  | CASA HR    | 10.63                                 | 0.08                                                            | 1                 |
|          | CORPSE HR  | 10.63                                 | 0.10                                                            | 1                 |
|          | MIMICS HR  | 10.57                                 | 0.22                                                            | 2                 |
|          | CASA NPP   | 10.66                                 | 0.44                                                            | 4                 |
|          | CASA NEP   | -0.03                                 | 0.48                                                            | 1428              |
|          | CORPSE NEP | -0.03                                 | 0.47                                                            | 1571              |
|          | MIMICS NEP | -0.09                                 | 0.62                                                            | 732               |
| 0°-23°S  | CASA HR    | 14.26                                 | 0.10                                                            | 1                 |
|          | CORPSE HR  | 14.30                                 | 0.12                                                            | 1                 |
|          | MIMICS HR  | 14.24                                 | 0.29                                                            | 2                 |
|          | CASA NPP   | 14.52                                 | 0.57                                                            | 4                 |
|          | CASA NEP   | -0.27                                 | 0.61                                                            | 232               |
|          | CORPSE NEP | -0.22                                 | 0.58                                                            | 262               |
|          | MIMICS NEP | -0.28                                 | 0.84                                                            | 296               |
| 24°-90°N | CASA HR    | 3.72                                  | 0.05                                                            | 1                 |
|          | CORPSE HR  | 3.74                                  | 0.07                                                            | 2                 |
|          | MIMICS HR  | 3.74                                  | 0.08                                                            | 2                 |
|          | CASA NPP   | 3.77                                  | 0.26                                                            | 7                 |

|            |       |      |      |
|------------|-------|------|------|
| CASA NEP   | -0.05 | 0.26 | 518  |
| CORPSE NEP | -0.03 | 0.24 | 810  |
| MIMICS NEP | -0.03 | 0.33 | 1135 |

---

Table S3: Multiple linear regression coefficients ( $\gamma$ ) and  $R^2$  are used to model interannual variability in heterotrophic respiration as a function of interannual variability in temperature,

NPP, or preceding year NPP. All variables have been detrended and deseasonalized. We list statistically significant predictors of HR IAV, as determined by p-values from ANOVA.

| Region   | Model IAV    | HR IAV Regression                                                      |                                          |                                            |
|----------|--------------|------------------------------------------------------------------------|------------------------------------------|--------------------------------------------|
|          |              | CASA-CNP<br>Temperature IAV<br>[Pg C y <sup>-1</sup> K <sup>-1</sup> ] | CASA-CNP NPP<br>Current year IAV<br>[--] | CASA-CNP NPP<br>Preceding year IAV<br>[--] |
| 61°-90°N | CASA HR      | <b>0.16</b> , 0.64                                                     | <b>0.74</b> , 0.67                       | -0.14, 0.02                                |
|          | CORPSE HR    | <b>0.42</b> , 0.54                                                     | <b>2.22</b> , 0.77                       | -0.23, 0.01                                |
|          | MIMICS HR    | <b>0.13</b> , 0.32                                                     | <b>0.63</b> , 0.40                       | 0.06, 0.00                                 |
|          | CASA-CNP NPP | <b>0.15</b> , 0.43                                                     |                                          |                                            |
| 24°-60°N | CASA HR      | <b>0.78</b> , 0.58                                                     | 0.2, 0.05                                | 0.33, 0.15                                 |
|          | CORPSE HR    | <b>1.00</b> , 0.57                                                     | -0.28, 0.06                              | 0.32, 0.08                                 |
|          | MIMICS HR    | <b>1.74</b> , 0.70                                                     | <b>-0.90</b> , 0.27                      | 0.05, 0.00                                 |
|          | CASA-CNP NPP | -0.38, 0.10                                                            |                                          |                                            |
| 1°-23°N  | CASA HR      | 0.17, 0.14                                                             | <b>-0.10</b> , 0.26                      | <b>0.12</b> , 0.45                         |
|          | CORPSE HR    | 0.00, 0.00                                                             | -0.06, 0.07                              | <b>0.17</b> , 0.61                         |
|          | MIMICS HR    | <b>1.03</b> , 0.68                                                     | <b>-0.40</b> , 0.60                      | -0.03, 0.00                                |
|          | CASA-CNP NPP | <b>-1.57</b> , 0.42                                                    |                                          |                                            |
| 0°-23°S  | CASA HR      | <b>0.24</b> , 0.17                                                     | <b>-0.07</b> , 0.17                      | <b>0.12</b> , 0.41                         |
|          | CORPSE HR    | -0.01, 0.00                                                            | -0.01, 0.00                              | <b>0.17</b> , 0.61                         |
|          | MIMICS HR    | <b>1.50</b> , 0.87                                                     | <b>-0.46</b> , 0.79                      | 0.03, 0.00                                 |
|          | CASA-CNP NPP | <b>-2.65</b> , 0.72                                                    |                                          |                                            |
| 24°-90°N | CASA         | 0.00, 0.00                                                             | 0.03, 0.03                               | <b>0.12</b> , 0.32                         |
|          | CORPSE       | -0.07, 0.04                                                            | 0.09, 0.13                               | <b>0.17</b> , 0.36                         |
|          | MIMICS       | <b>0.32</b> , 0.42                                                     | <b>-0.26</b> , 0.65                      | -0.08, 0.04                                |
|          | CASA-CNP NPP | <b>-1.11</b> , 0.52                                                    |                                          |                                            |

\*bolded values are statistically significant (p < 0.05)

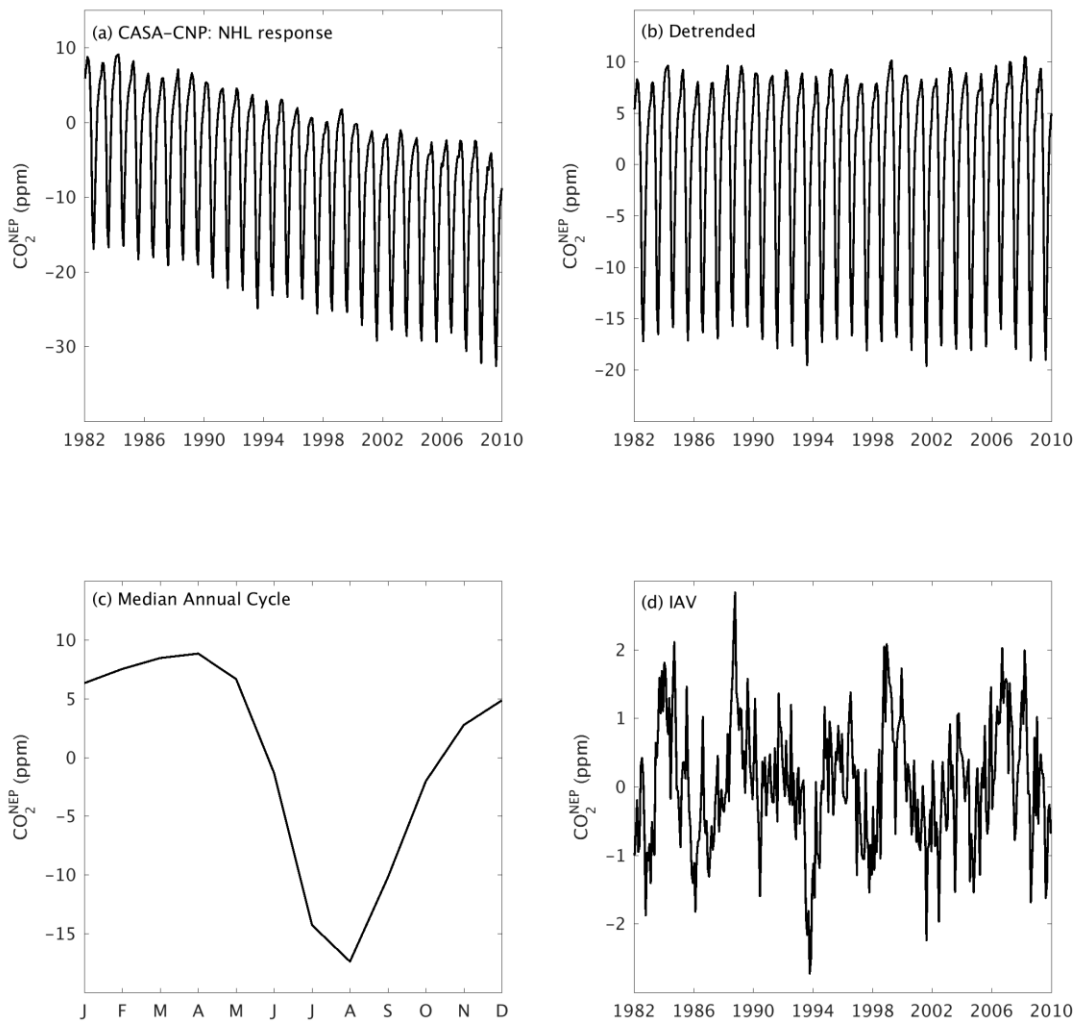

Figure S1: Depiction of interannual variability (IAV) calculation. (a) Multi-site mean CASA-CNP  $\text{CO}_2^{\text{NEP}}$  in the Northern Hemisphere high latitudes (NHL) region for 1982 to 2010 ( $\text{CO}_2^{\text{NEP}} = \text{CO}_2^{\text{HR}} + \text{CO}_2^{\text{NPP}}$ ). (b) Detrended CASA-CNP  $\text{CO}_2^{\text{NEP}}$  timeseries after removing a third-order polynomial fit. (c) Climatological annual cycle calculated using the median of monthly values over the analysis period. (d) CASA-CNP  $\text{CO}_2^{\text{NEP}}$  interannual variability calculated from removing the climatological annual cycle from each year in the detrended timeseries.

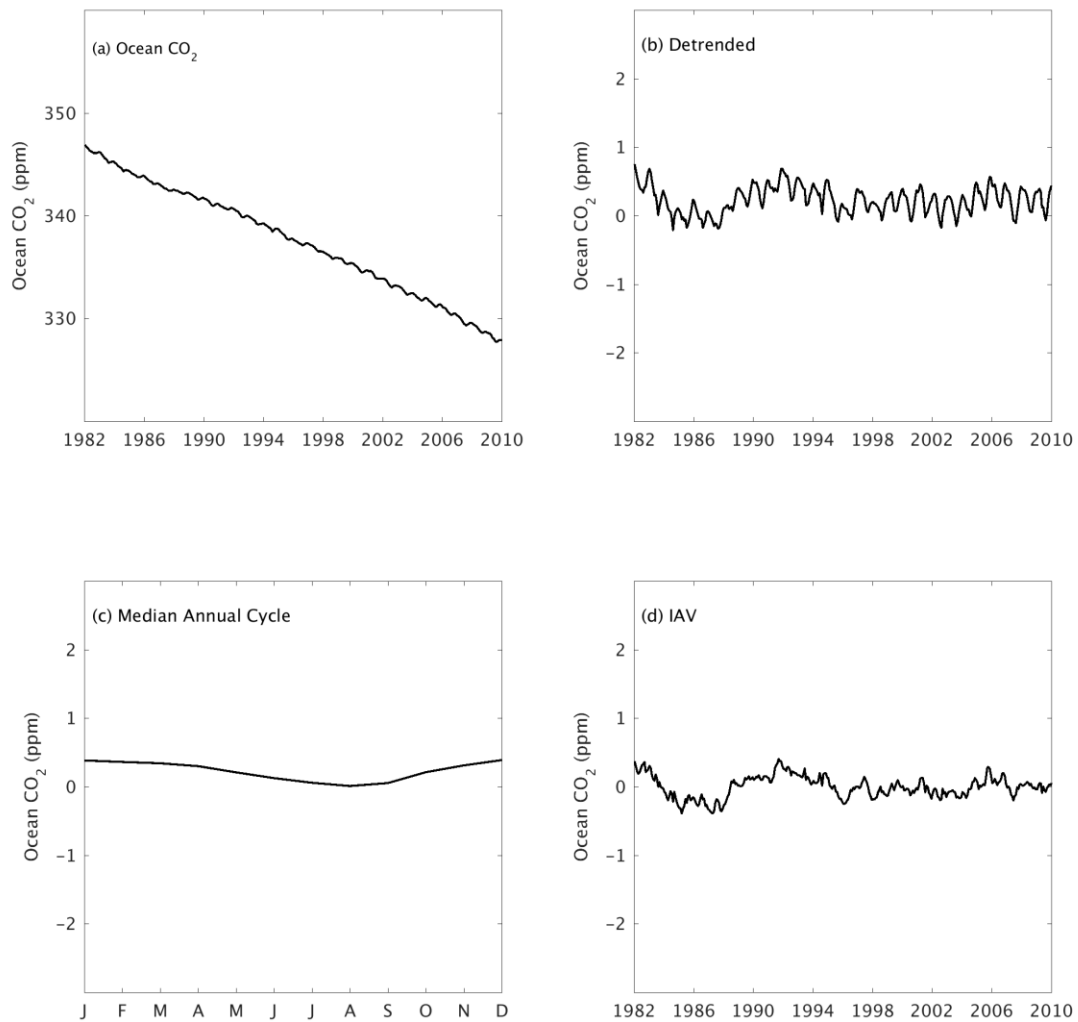

Figure S2: CO<sub>2</sub> concentrations from ocean fluxes. CO<sub>2</sub> output from GEOS Chem simulation forced by CO<sub>2</sub> CAMS inversion 17r1. (a) Averaged CO<sub>2</sub> in the Northern Hemisphere high latitudes (NHL) region for 1982 to 2010. (b) Detrended CO<sub>2</sub> timeseries after removing a third-order polynomial fit. (c) Climatological annual cycle calculated using the median of monthly values over the analysis period. (d) CO<sub>2</sub> interannual variability calculated from removing the climatological annual cycle from each year in the detrended timeseries.

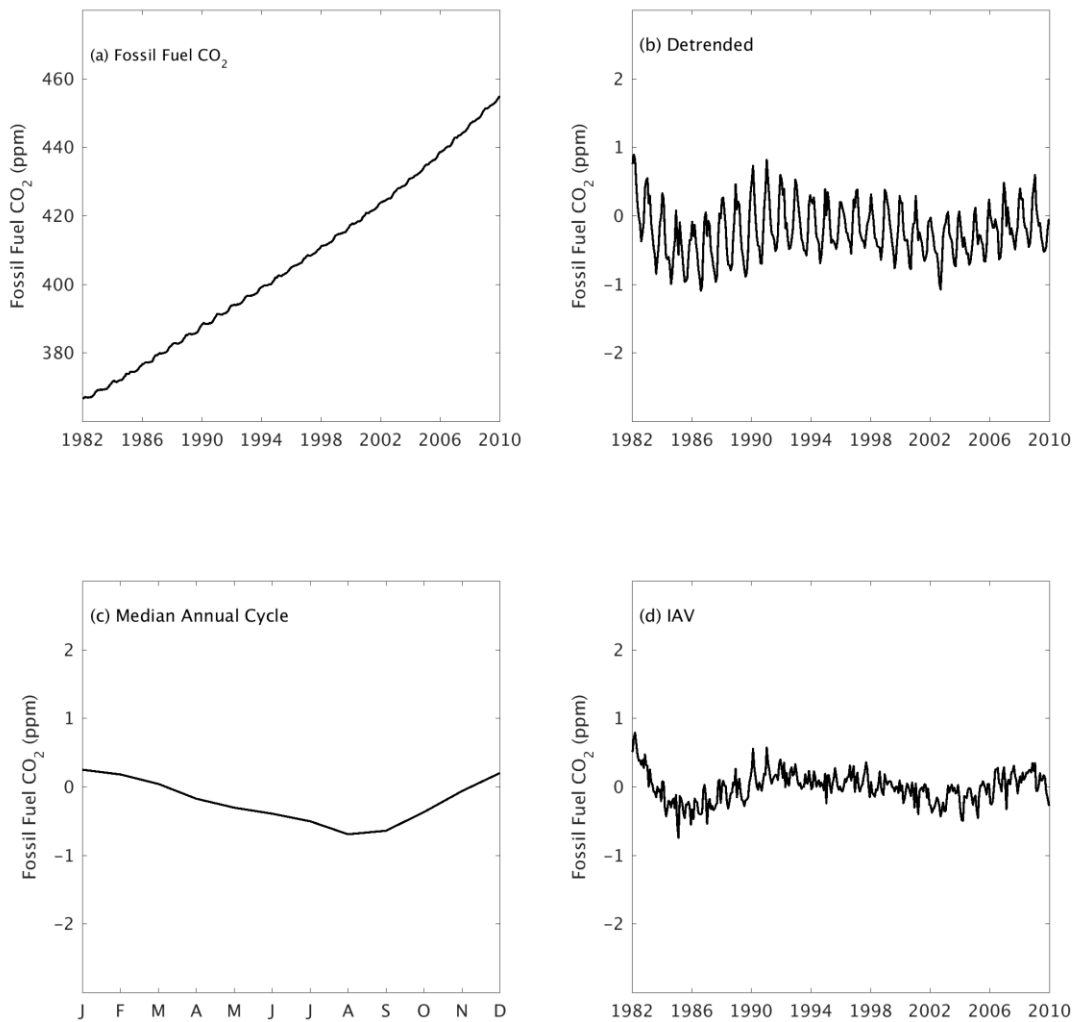

Figure S3: CO<sub>2</sub> concentrations from fossil fuel emissions. CO<sub>2</sub> output from GEOS Chem simulation forced by CO<sub>2</sub> CAMS inversion 17r1. (a) Averaged CO<sub>2</sub> in the Northern Hemisphere high latitudes (NHL) region for 1982 to 2010. (b) Detrended CO<sub>2</sub> timeseries after removing a third-order polynomial fit. (c) Climatological annual cycle calculated using the median of monthly values over the analysis period. (d) CO<sub>2</sub> interannual variability calculated from removing the climatological annual cycle from each year in the detrended timeseries.

Land mask Methodology: CASA Soil Heterotrophic Respiration (HR)

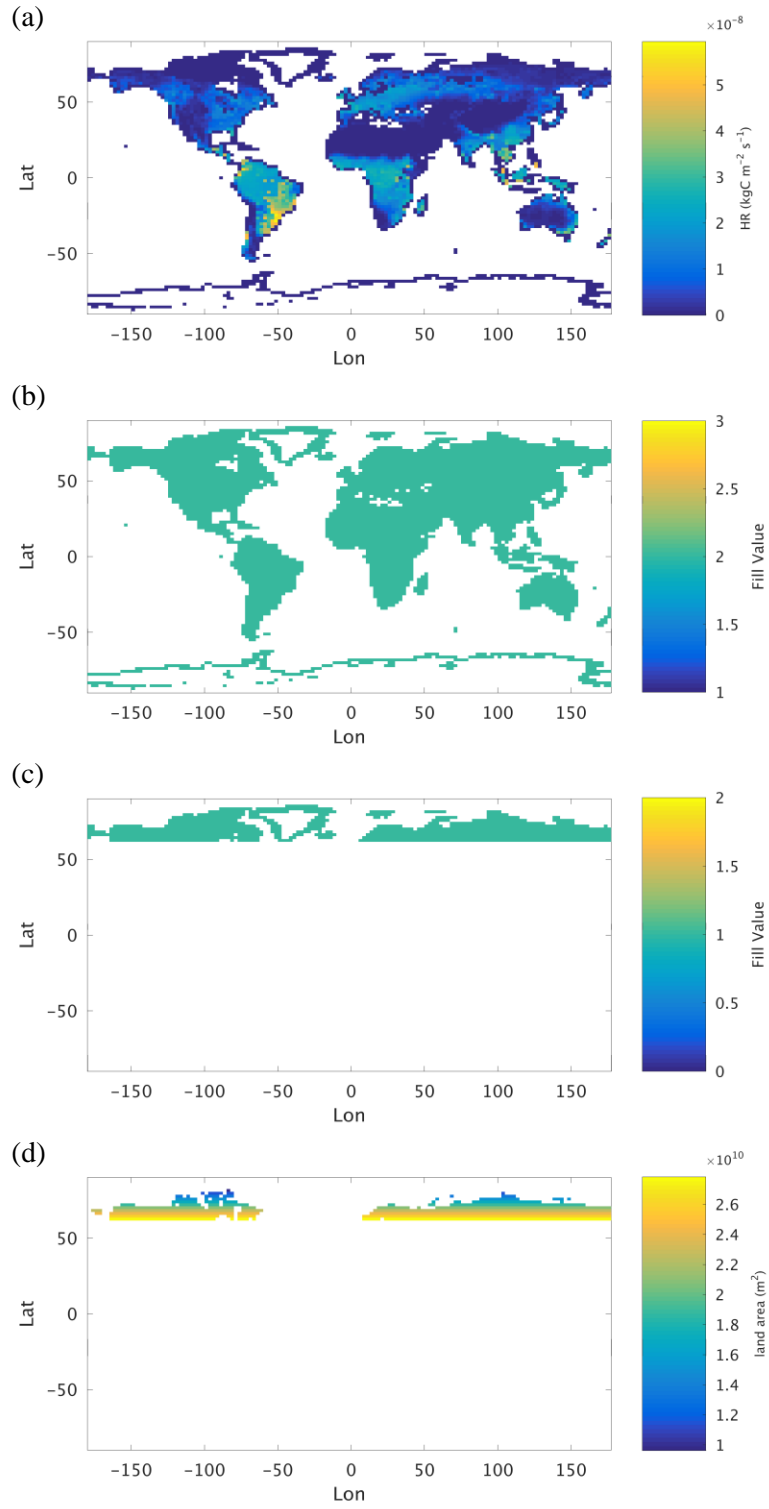



Figure S4: Example land mask for the Northern Hemisphere High Latitudes (NHL). (a) CASA-CNP soil heterotrophic respiration (HR) for January 1982. (b) Global land mask with land gridcells set to a constant fill value and ocean gridcells set to NaN. (c) Land mask after application of a separate NHL latitude band mask with values of 0 south of 61 °N. Land gridcells were reassigned a value of 1. (d) NHL land mask weighted by area with Greenland removed.
